# Supplementary material for: Shape memory epoxy vitrimers based on DGEBA crosslinked with dicarboxylic acids and their blends with citric acid
Source: Royal Society of Chemistry journal article supplement (doi:10.1039/c6ra18010h), 2016-01-01
Supplement: c6ra18010h2.pdf [file c6ra18010h2.pdf]

Electronic Supplementary Information

**Shape memory epoxy vitrimers based on DGEBA crosslinked with dicarboxylic acids and their blends with citric acid**

F. I. Altuna, C. E. Hoppe and R. J. J. Williams

División Polímeros Nanoestructurados, Instituto de Investigaciones en Ciencia y Tecnología de los Materiales (INTEMA), Universidad Nacional de Mar del Plata (UNMDP) and Consejo Nacional de Investigaciones Científicas y Técnicas (CONICET), Av. J.B. Justo 4302, B7608FDQ, Mar del Plata, Argentina

## 1. Formulations used to obtain the polymers

Table S1 shows the amount of each reagent needed for a typical synthesis of every vitrimer analyzed in this manuscript.

Table S1. Formulations used to synthesize the epoxy-acid vitrimers.

| Label       | DGEBA |      | CA.H <sub>2</sub> O |      | SA    |      | GA    |      | 1MI    |      | R   |
|-------------|-------|------|---------------------|------|-------|------|-------|------|--------|------|-----|
|             | g     | meq  | g                   | meq  | g     | meq  | g     | meq  | g      | mmol |     |
| <b>CS11</b> | 4.0   | 23.0 | 0.731               | 10.4 | 1.055 | 10.4 | 0     | 0    | 0.0944 | 1.15 | 1.1 |
| <b>S12</b>  | 4.0   | 23.0 | 0                   | 0    | 1.935 | 19.2 | 0     | 0    | 0.0944 | 1.15 | 1.2 |
| <b>S15</b>  | 4.0   | 23.0 | 0                   | 0    | 1.548 | 15.3 | 0     | 0    | 0.0944 | 1.15 | 1.5 |
| <b>S20</b>  | 4.0   | 23.0 | 0                   | 0    | 1.161 | 11.5 | 0     | 0    | 0.0944 | 1.15 | 2.0 |
| <b>G15</b>  | 4.0   | 23.0 | 0                   | 0    | 0     | 0    | 1.011 | 15.3 | 0.0944 | 1.15 | 1.5 |

## 2. Calculation of the shape fixity and recovery ratios

The parameters used to evaluate the shape memory performance are shape fixity ( $R_f$ ) and shape recovery ( $R_r$ ) ratios.  $R_f$  and  $R_r$  are defined as follows for each cycle ( $N$ ):

$$R_f(N) = \frac{\gamma_{\text{unloaded}}(N) - \gamma_{\text{permanent}}(N)}{\gamma_{\text{max}}(N) - \gamma_{\text{permanent}}(N)} \cdot 100\% \quad (\text{Eq. S1})$$

$$R_r(N) = \frac{\gamma_{\text{max}}(N) - \gamma_{\text{permanent}}(N)}{\gamma_{\text{max}}(N) - \gamma_{\text{permanent}}(N-1)} \cdot 100\% \quad (\text{Eq. S2})$$

where  $\gamma_{\text{max}}$  and  $\gamma_{\text{unloaded}}$  are the strain values in the temporary form under stress at 100°C, and after releasing the stress at room temperature;  $\gamma_{\text{permanent}}$  is the strain value measured at 100°C when no stress is applied.

Figure S1 shows schematically the values used to calculate  $R_f$  and  $R_r$  for the  $N$ th cycle of a shape memory test.

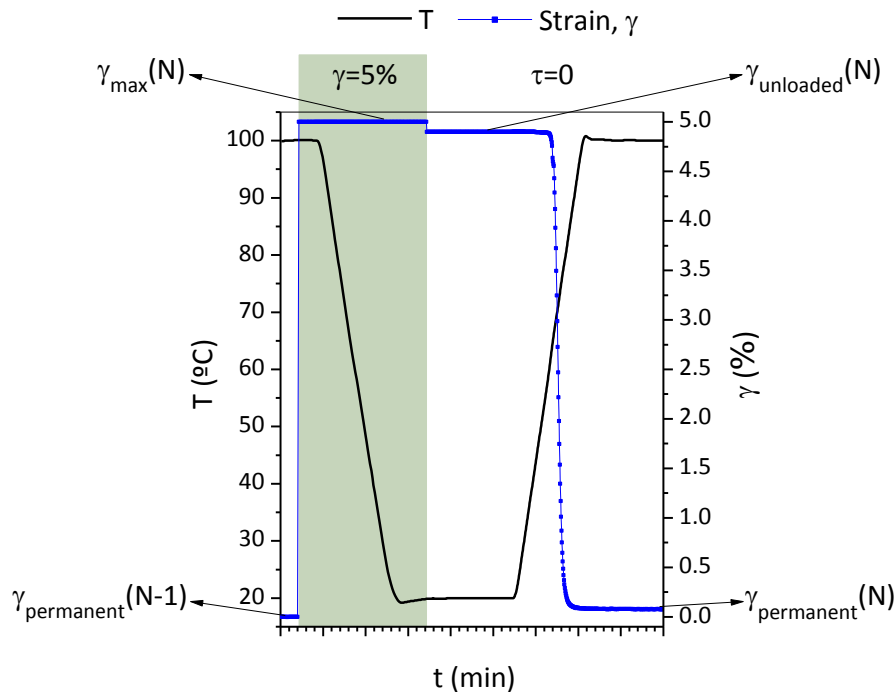

Figure S1. Schematic temperature- and deformation-time curves for the  $N$ th-cycle in a shape memory test.

### 3. Network parameters of the epoxy-acid-imidazole vitrimers

Table S2 summarizes important network parameters that are useful to explain some of their properties. Assuming that all the vitrimers have similar densities, it can be stated that the trends in mass concentrations (expressed in mmol/g) will hold when expressed as volume concentration (mmol/cm<sup>3</sup>).

Table S2. 1MI, phenyl groups and -OH mass concentration in the epoxy-acid vitrimers.

| Label       | M <sub>tot</sub> | 1MI    |      | Phenyl | -OH   | [1MI]  | [Phenyl] | [-OH]  |
|-------------|------------------|--------|------|--------|-------|--------|----------|--------|
|             | g                | g      | mmol | mmol   | mmol  | mmol/g | mmol/g   | mmol/g |
| <b>CS11</b> | 5.880            | 0.0944 | 1.15 | 23.64  | 24.59 | 0.196  | 4.02     | 4.18   |
| <b>S12</b>  | 6.029            | 0.0944 | 1.15 | 23.64  | 19.52 | 0.191  | 3.92     | 3.24   |
| <b>S15</b>  | 5.642            | 0.0944 | 1.15 | 23.64  | 15.62 | 0.204  | 4.19     | 2.77   |
| <b>S20</b>  | 5.255            | 0.0944 | 1.15 | 23.64  | 11.82 | 0.219  | 4.50     | 2.25   |
| <b>G15</b>  | 5.105            | 0.0944 | 1.15 | 23.64  | 15.62 | 0.225  | 4.63     | 3.06   |

#### 4. Calculation of activation energy for the transesterification reaction

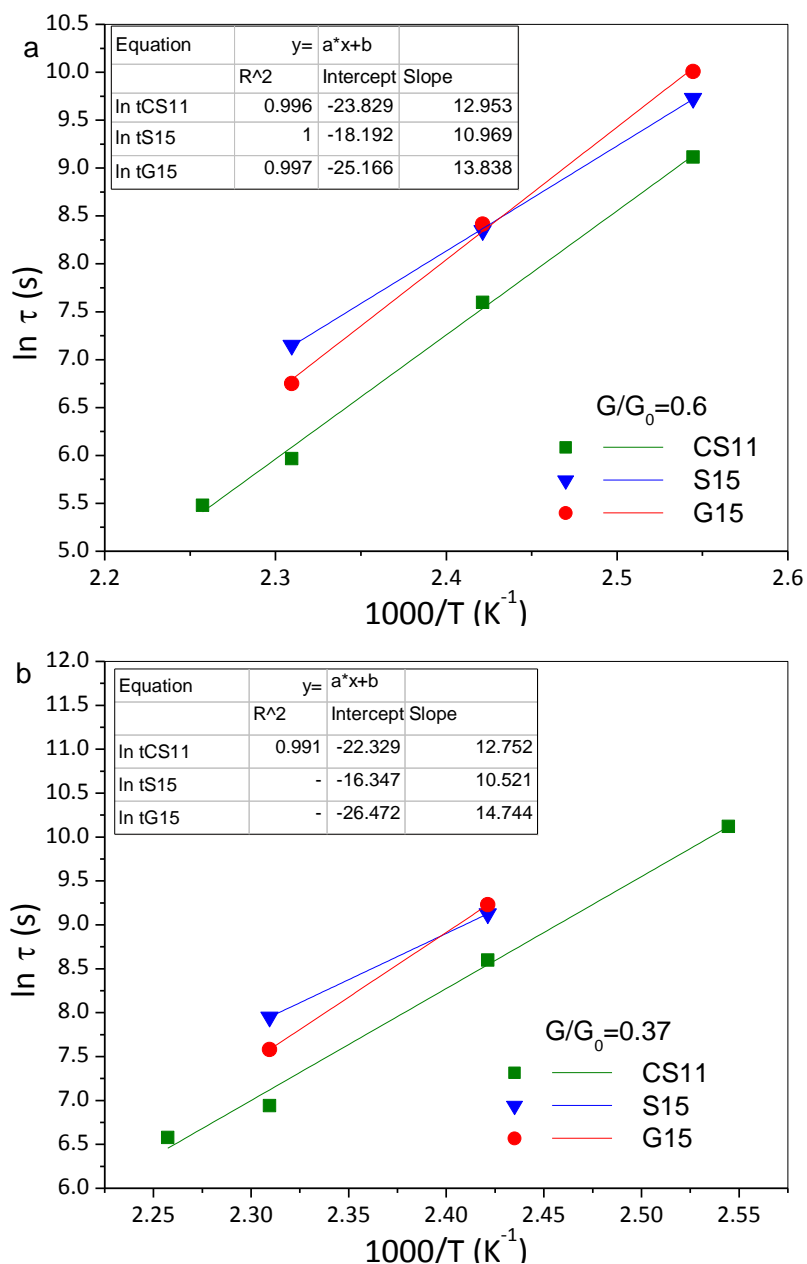

Figure S2.  $\ln \tau$  vs  $1000/T$  for 40% (a) and 63% (b) relaxation for CS11, S15 and G15 vitrimers, and the corresponding fitting to Eq. 1.

The temperature of topology freezing ( $T_v$ ) was defined as the temperature at which the vitrimer takes 1 day (86400 s) to achieve a stress relaxation of 63%. From the extrapolation of the experimental data fitting for  $G/G_0 = 0.37$  (Figure S2b),  $T_v$  values of 105°C, 107°C and 117°C were obtained for CS11, S15 and G15 respectively.
